# Supplementary figures and images for: Deciphering Genomic Heterogeneity and the Internal Composition of Tumour Activities through a Hierarchical Factorisation Model
Source: MDPI journal article supplement (doi:10.3390/math9212833), 2021-11-08

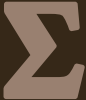

*mathematics*

Supplement: s1 [file s1]

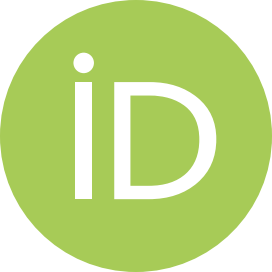

Supplement: s1 [file s1]

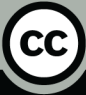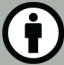

BY

Supplement: s1 [file s1]
